# Supplementary material for: Early-life exposure to bisphenol A and reproductive-related outcomes in rodent models: a systematic review and meta-analysis
Source: publisher site journal article supplement (doi:10.18632/aging.103620), 2020-09-30
Supplement: Supplementary file [file aging-v12i18-103620-supplementary-material-SD1.pdf]

## SUPPLEMENTARY FIGURES

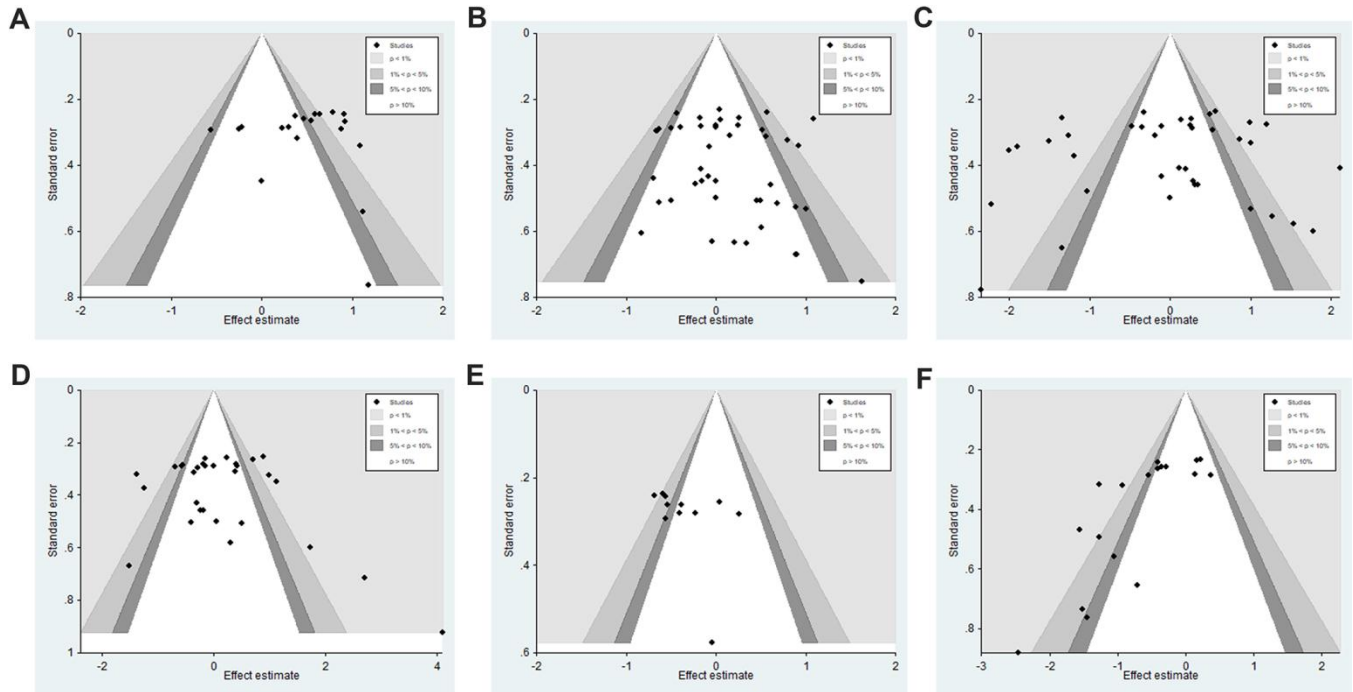

**Supplementary Figure 1. Funnel plots of the analysis.** Notes: (A) Funnel plot of prostate weight (0-60ug/kg/day); (B) Funnel plot of testis weight (0-60ug/kg/day);(C) Funnel plot of epididymis weight (0-60ug/kg/day); (D) Funnel plot of seminal vesicle weight (0-60ug/kg/day); (E) Funnel plot of daily sperm production (0-60ug/kg/day); (F) Funnel plot of epididymal sperm count (0-60ug/kg/day).

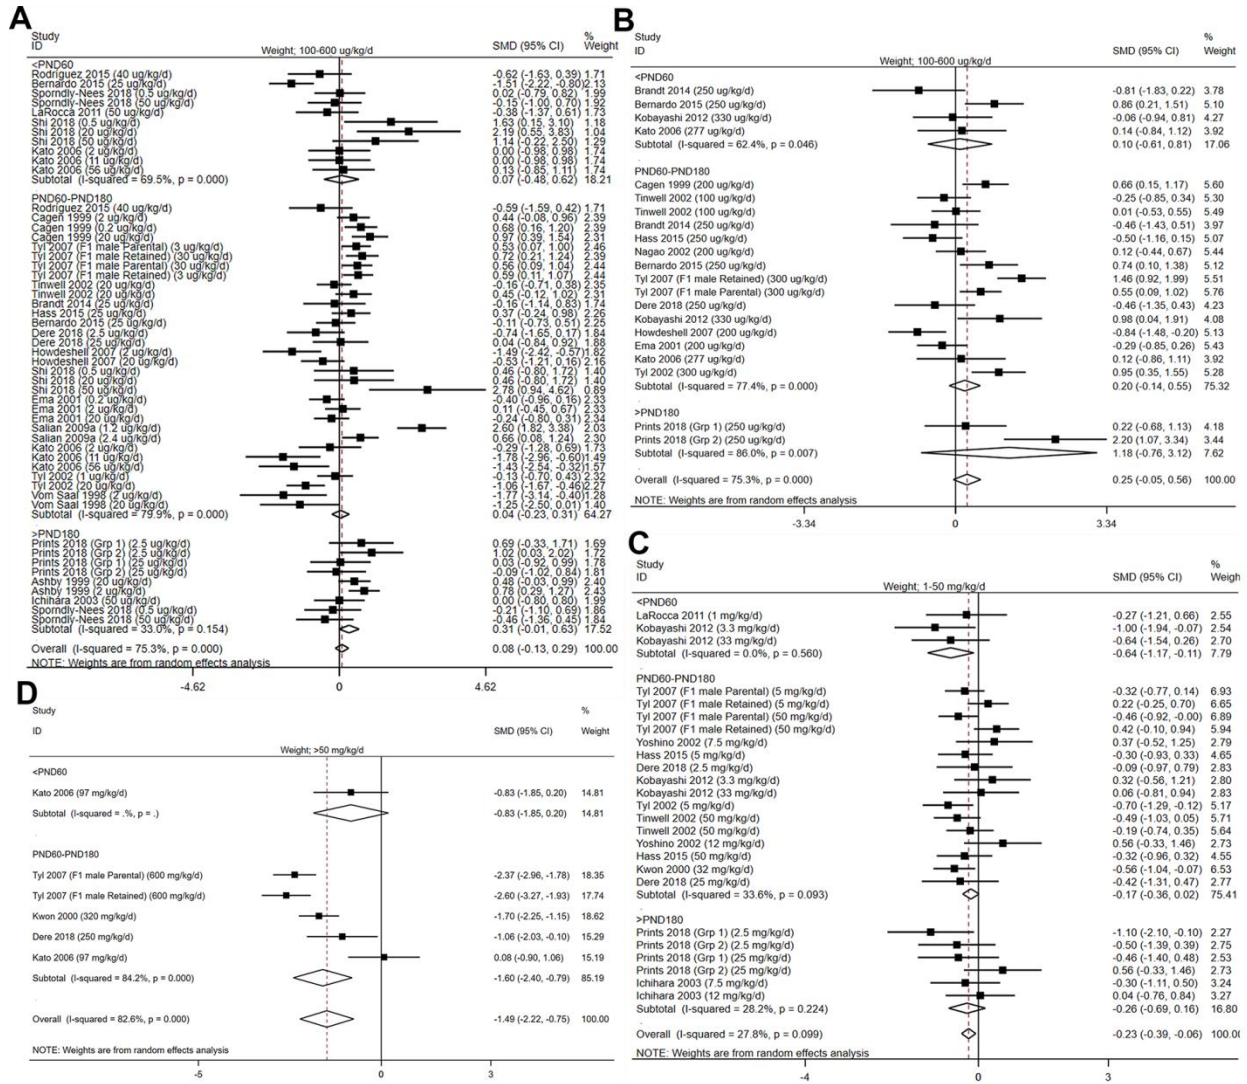

**Supplementary Figure 2. Forest plots of body weight.** Notes: (A) Forest plot of body weight (0-60ug/kg/day); (B), Forest plot of body weight (100-600ug/kg/day); (C) Forest plot of body weight (1-50mg/kg/day); (D), Forest plot of body weight (>50mg/kg/day).

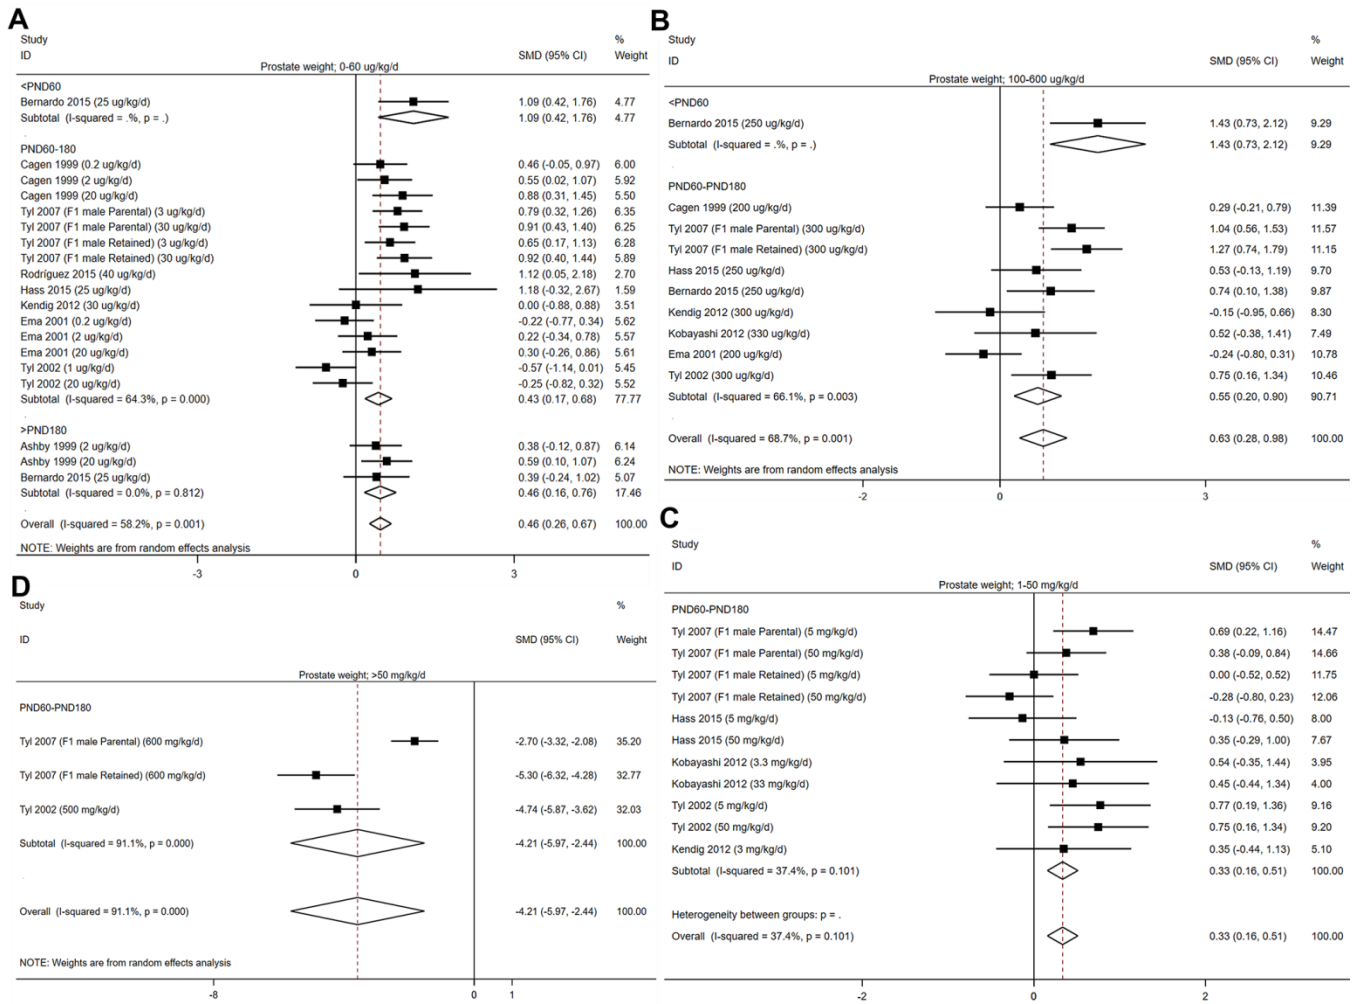

**Supplementary Figure 3. Forest plots of prostate weight.** Notes: (A) Forest plot of prostate weight (0-60ug/kg/day); (B) Forest plot of prostate weight (100-600ug/kg/day); (C) Forest plot of prostate weight (1-50mg/kg/day); (D) Forest plot of prostate weight (>50mg/kg/day).

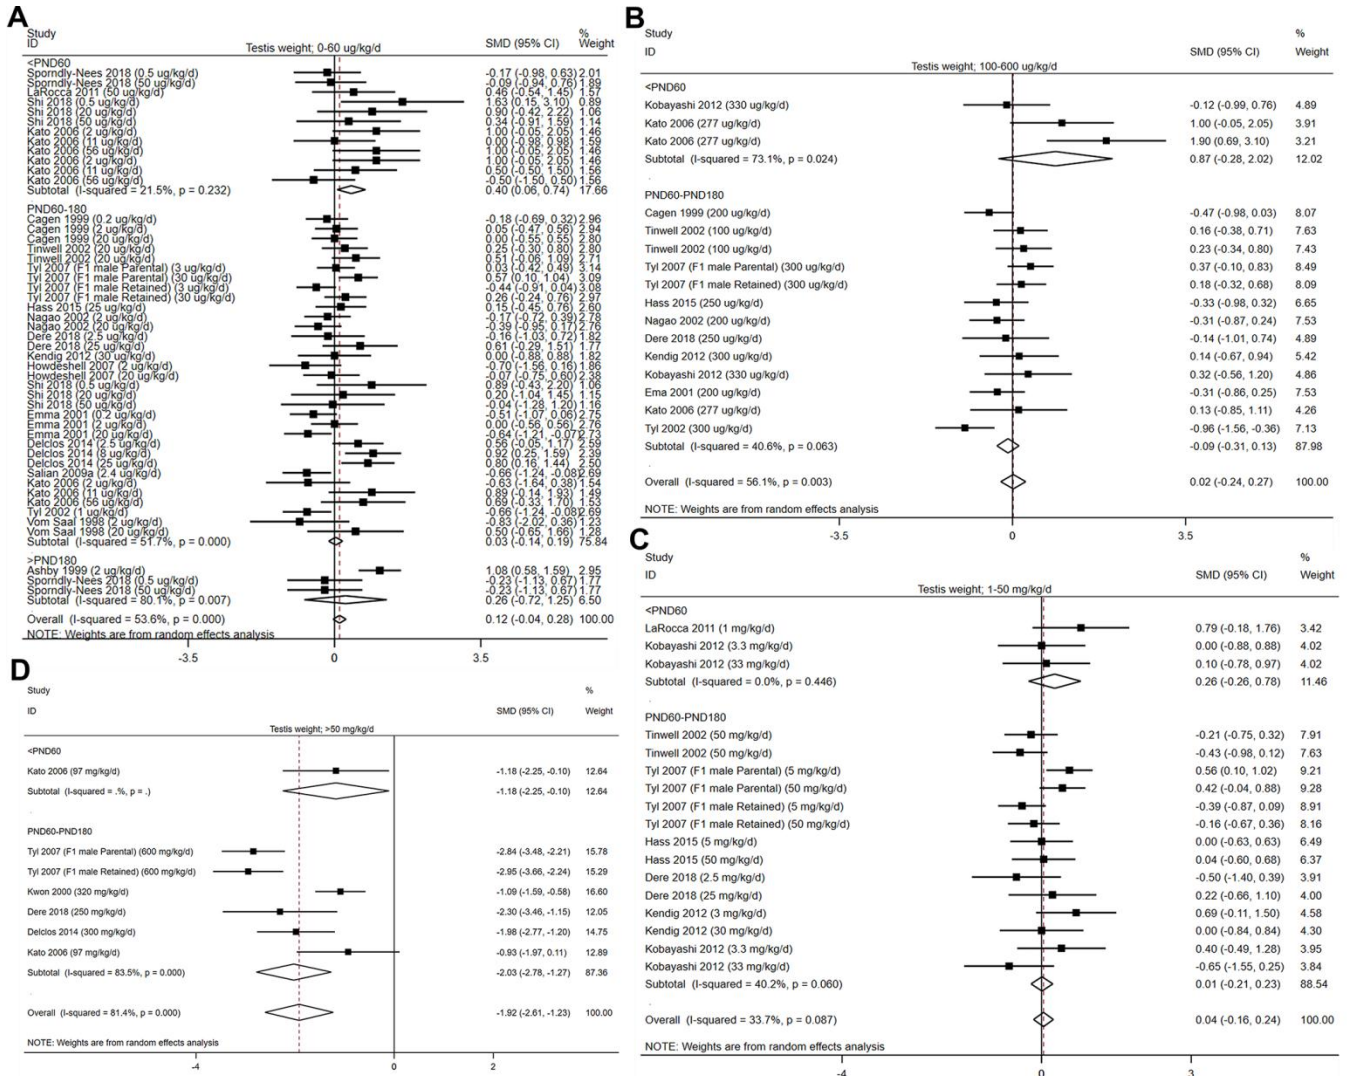

**Supplementary Figure 4. Forest plots of testis weight.** Notes: (A) Forest plot of testis weight (0-60ug/kg/day); (B) Forest plot of testis weight (100-600ug/kg/day); (C) Forest plot of testis weight (1-50mg/kg/day); (D) Forest plot of testis weight (>50mg/kg/day)



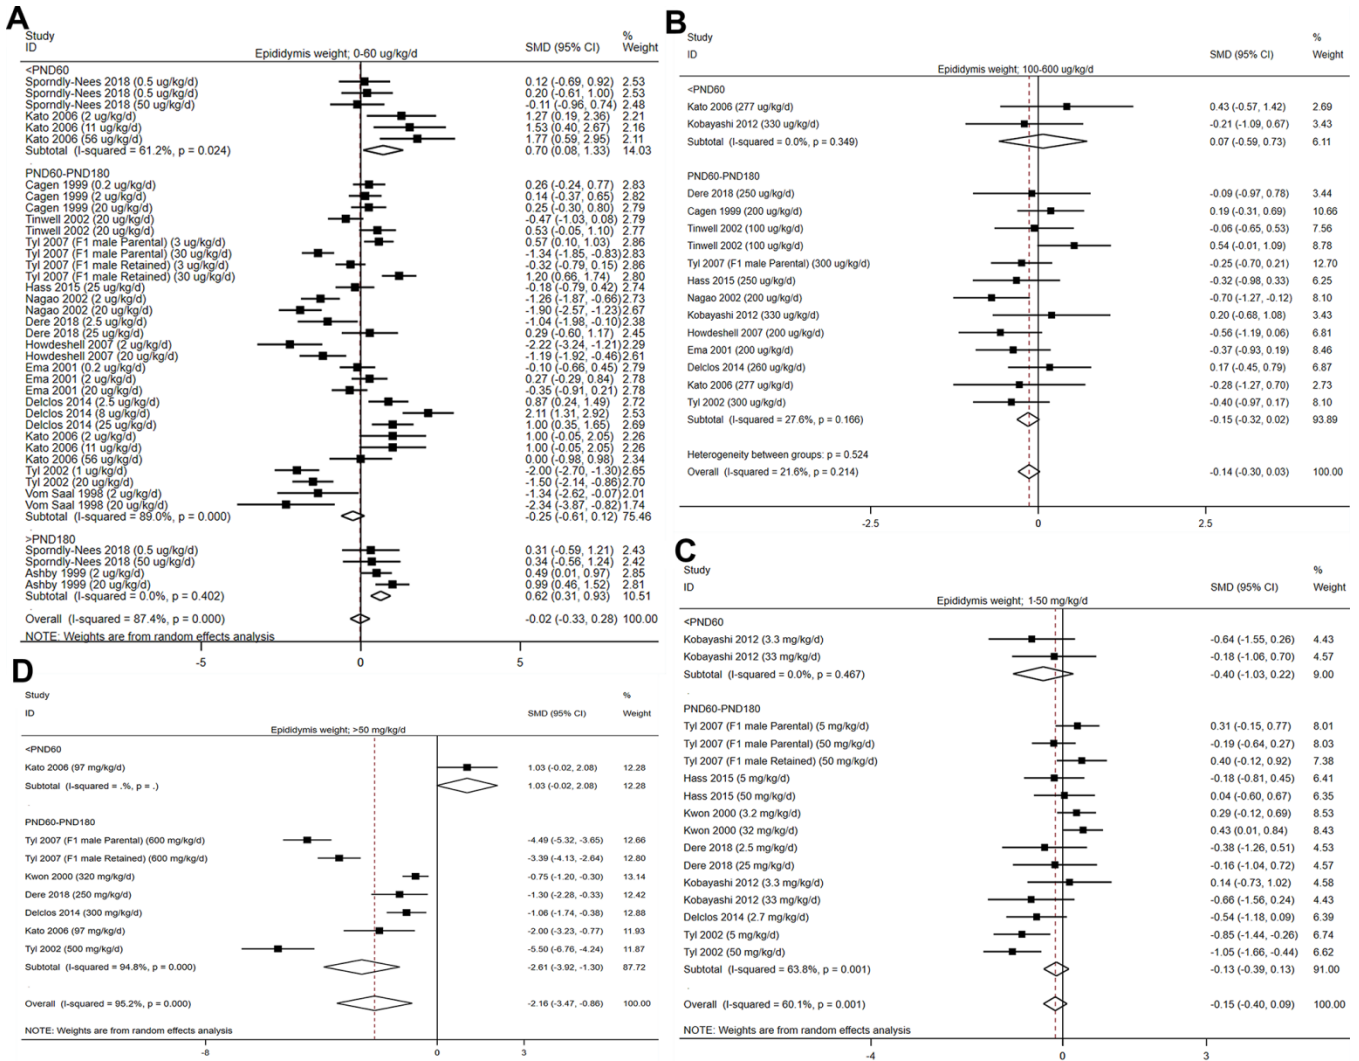

**Supplementary Figure 5. Forest plots of epididymis weight.** Notes: (A) Forest plot of epididymis weight (0-60ug/kg/day); (B) Forest plot of epididymis weight (100–600ug/kg/day); (C) Forest plot of epididymis weight (1-50mg/kg/day); (D) Forest plot of epididymis weight (>50mg/kg/day)

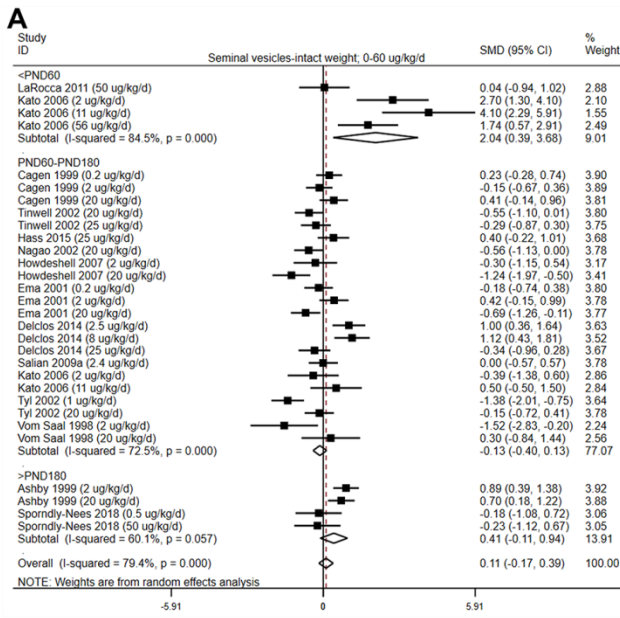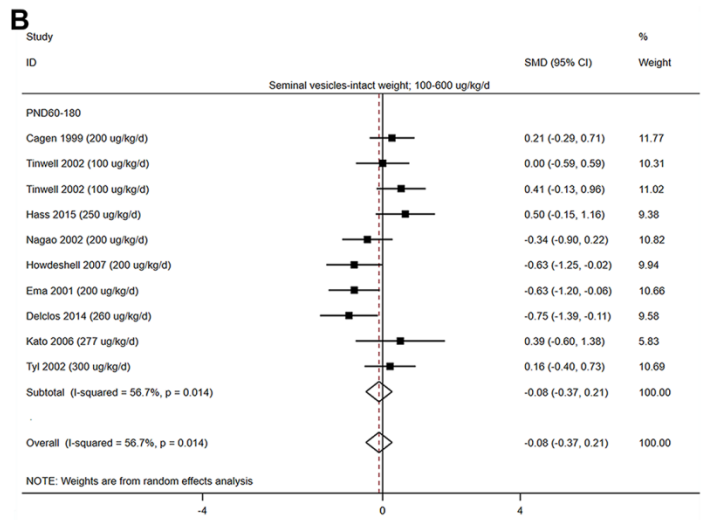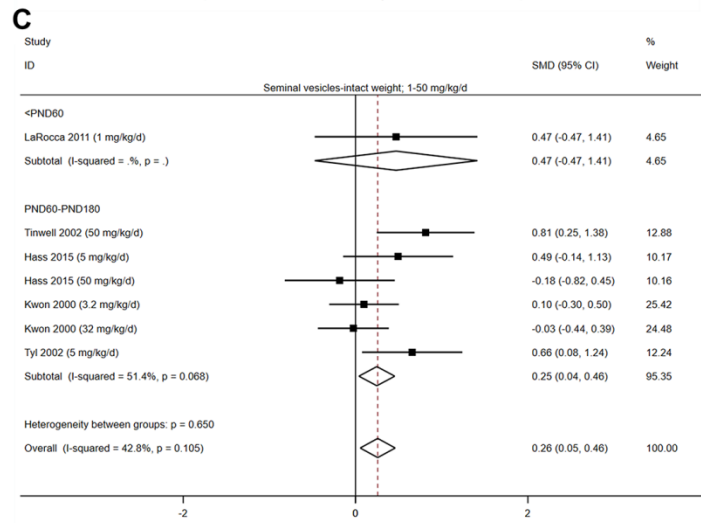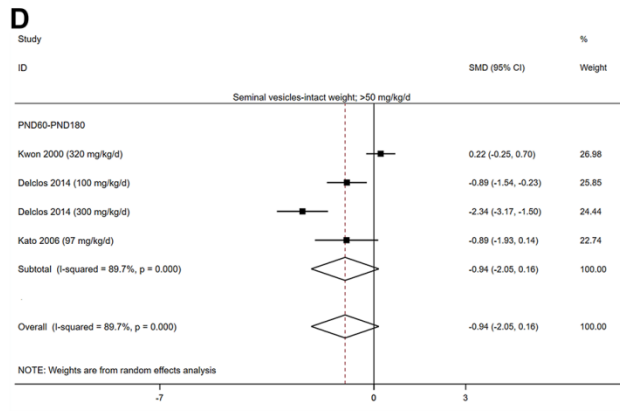

**Supplementary Figure 6. Forest plots of seminal vesicle weight.** Notes: (A) Forest plot of seminal vesicle weight (0-60ug/kg/day); (B) Forest plot of seminal vesicle weight (100–600ug/kg/day); (C) Forest plot of seminal vesicle weight (1-50mg/kg/day); (D) Forest plot of seminal vesicle weight (>50mg/kg/day).

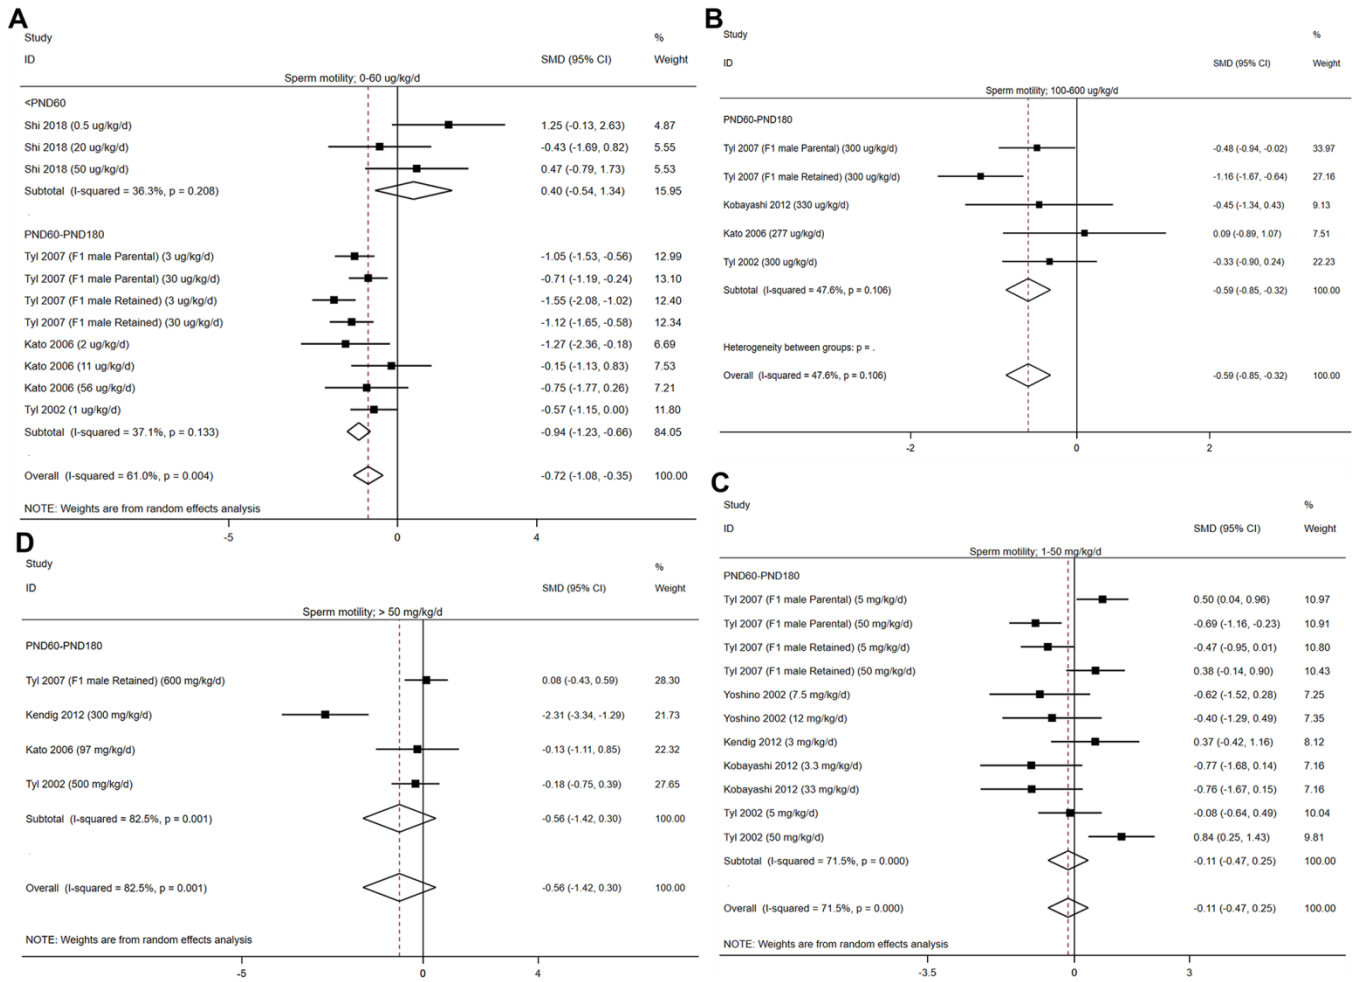

**Supplementary Figure 7. Forest plots of sperm motility.** Notes: (A) Forest plot of sperm motility (0-60ug/kg/day); (B) Forest plot of sperm motility (100–600ug/kg/day); (C) Forest plot of sperm motility (1-50mg/kg/day); (D) Forest plot of sperm motility (>50mg/kg/day).

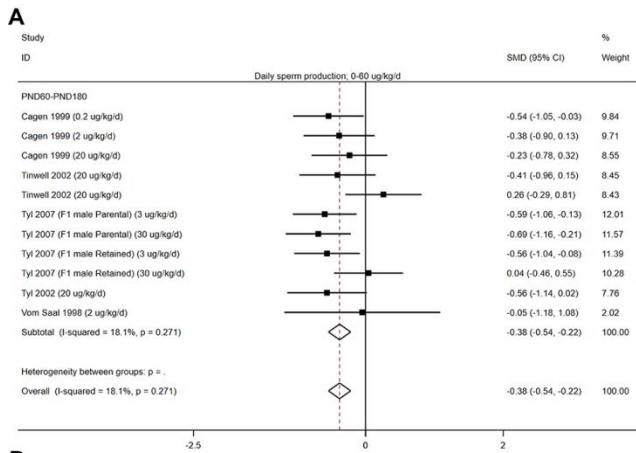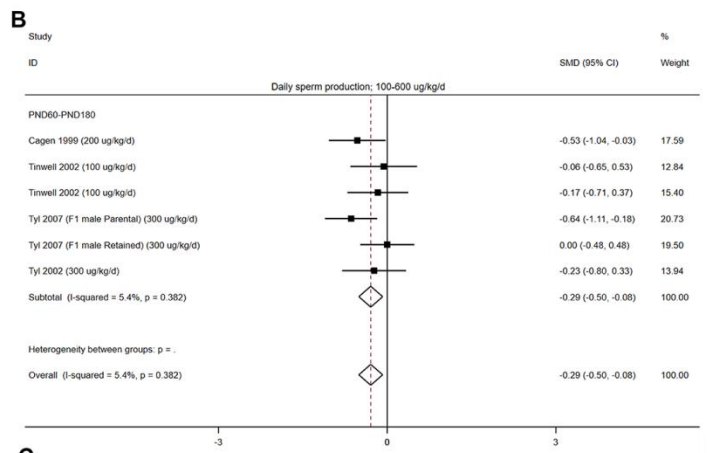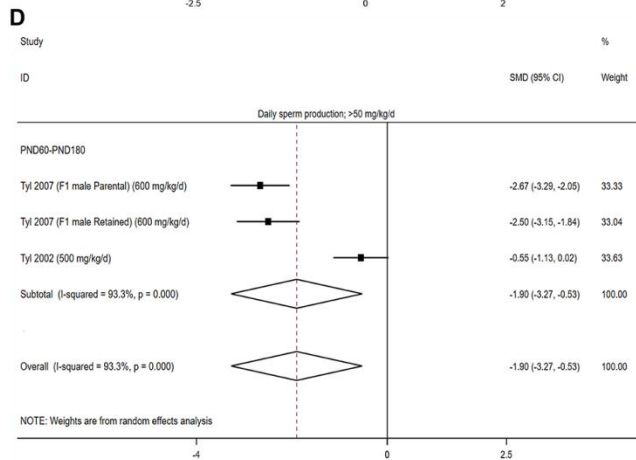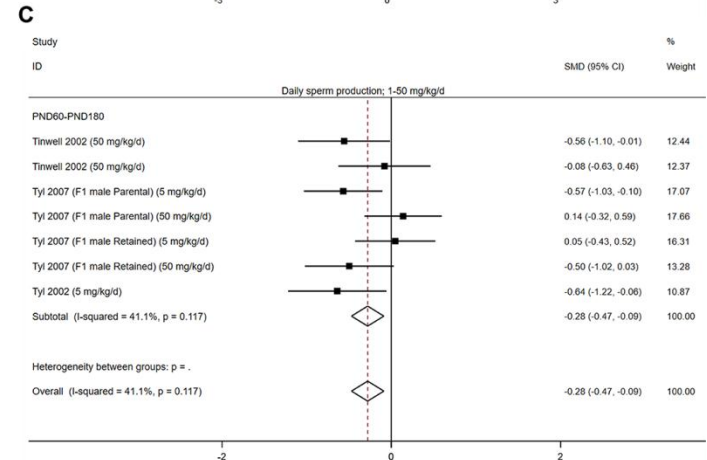

**Supplementary Figure 8. Forest plots of daily sperm production.** Notes: (A) Forest plot of daily sperm production (0-60ug/kg/day); (B) Forest plot of daily sperm production (100-600ug/kg/day); (C) Forest plot of daily sperm production (1-50mg/kg/day); (D) Forest plot of daily sperm production (>50mg/kg/day).



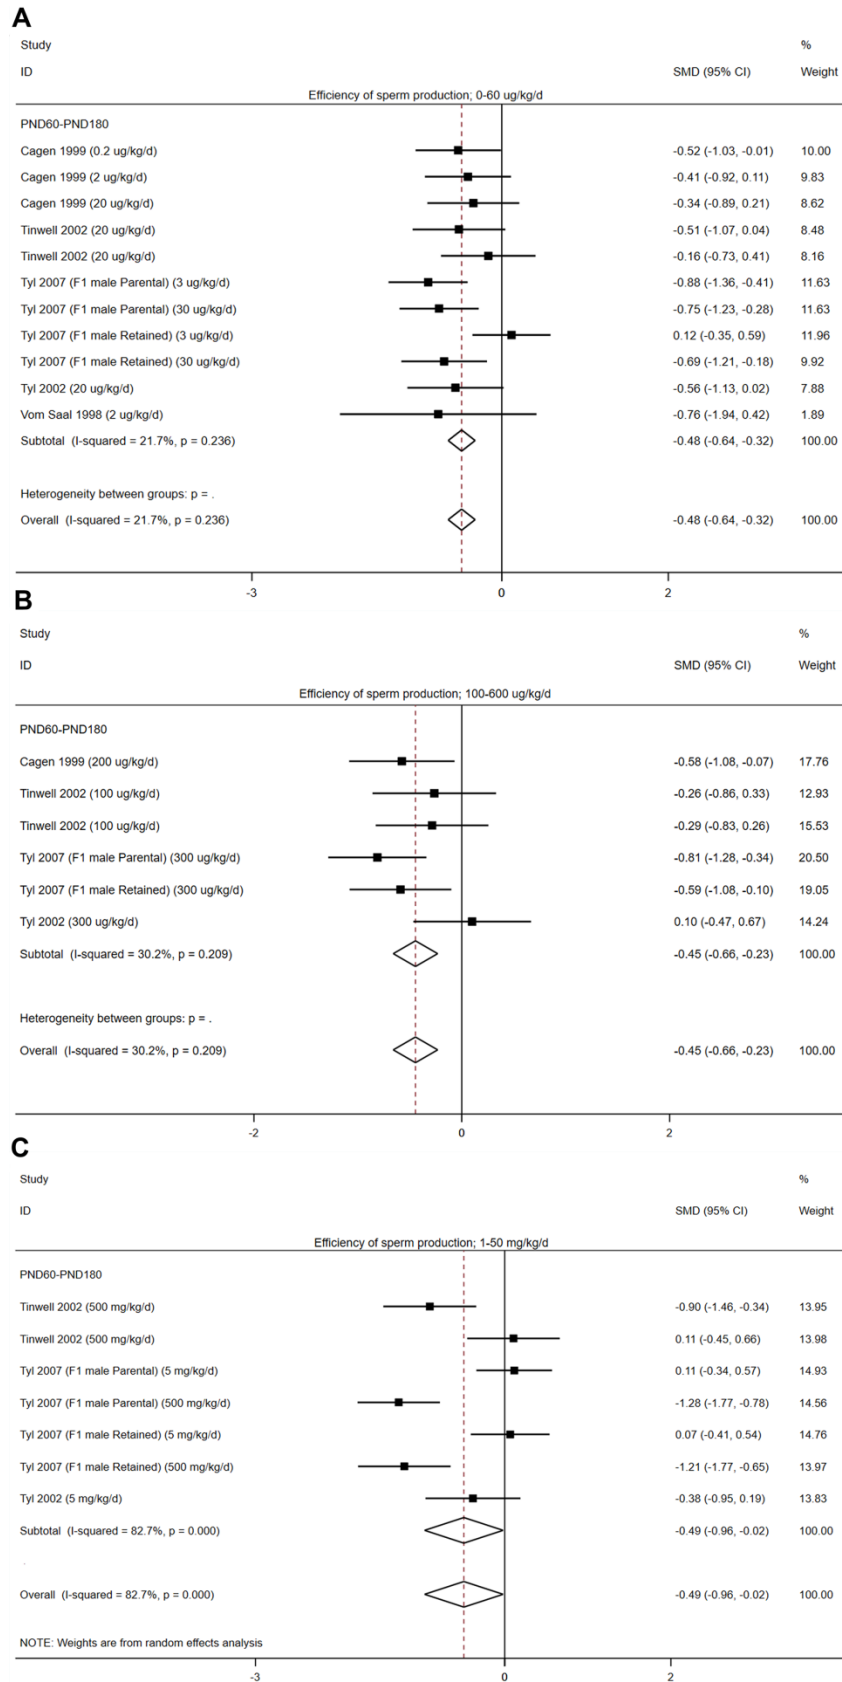

**Supplementary Figure 9. Forest plots of efficiency of sperm production.** Notes: (A) Forest plot of daily sperm production (0-60ug/kg/day); (B) Forest plot of daily sperm production (100–600ug/kg/day); (C) Forest plot of daily sperm production (1-50mg/kg/day).

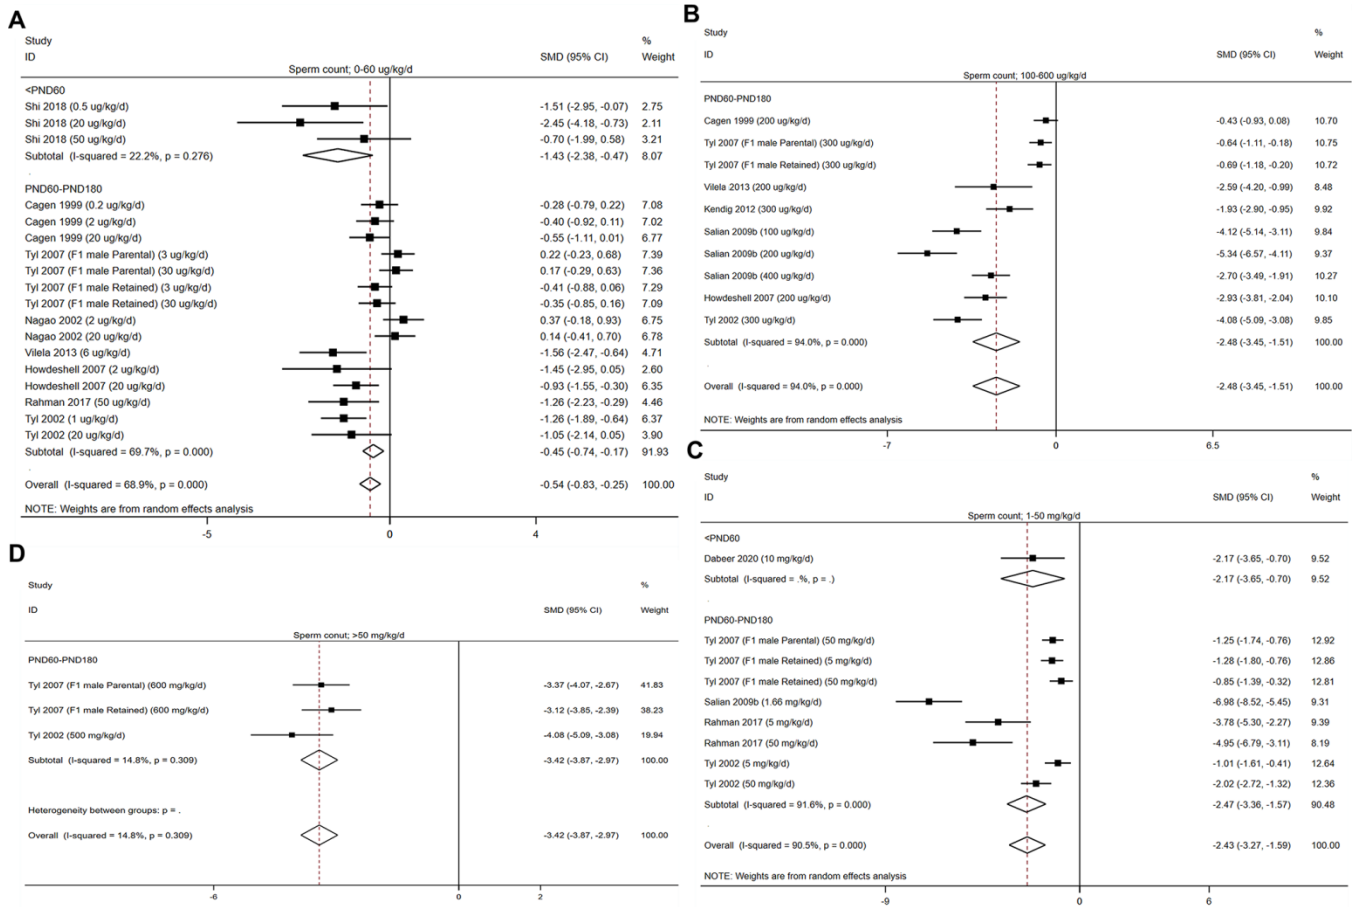

**Supplementary Figure 10. Forest plots of epididymal sperm count.** Notes: (A) Forest plot of epididymal sperm count (0-60ug/kg/day); (B) Forest plot of epididymal sperm count (100–600ug/kg/day); (C) Forest plot of epididymal sperm count (1-50mg/kg/day); (D) Forest plot of daily epididymal sperm count (>50mg/kg/day).
