# Supplementary material for: Early-life exposure to bisphenol A and reproductive-related outcomes in rodent models: a systematic review and meta-analysis
Source: publisher site journal article supplement (doi:10.18632/aging.103620), 2020-09-30
Supplement: Supplementary file [file aging-v12i18-103620-supplementary-material-SD4.pdf]

## SUPPLEMENTARY TABLES

Supplementary Table 3. Number of studies (No. comparisons) of each analysis.

| Author Ref                                       | Dose          |                  |               |              |
|--------------------------------------------------|---------------|------------------|---------------|--------------|
|                                                  | 0-60ug/kg/day | 100-600ug/kg/day | 1-50mg/kg/day | >50mg/kg/day |
| <b>Body weight</b>                               |               |                  |               |              |
| <PND60                                           | 6(11)         | 4(4)             | 2(3)          | 1(1)         |
| PND60-PND180                                     | 15(32)        | 13(15)           | 9(16)         | 4(5)         |
| >PND180                                          | 4(9)          | 1(2)             | 2(6)          | —            |
| Total                                            | 20(52)        | 14(21)           | 11(25)        | 4(6)         |
| <b>Prostate weight</b>                           |               |                  |               |              |
| <PND60                                           | 1(1)          | 1(1)             | —             | —            |
| PND60-PND180                                     | 7(15)         | 8(9)             | 5(11)         | 2(3)         |
| >PND180                                          | 2(3)          | —                | —             | —            |
| Total                                            | 9(19)         | 8(10)            | 5(11)         | 2(3)         |
| <b>Testis weight</b>                             |               |                  |               |              |
| <PND60                                           | 4(12)         | 2(3)             | 2(3)          | 1(1)         |
| PND60-PND180                                     | 15(33)        | 11(13)           | 6(14)         | 5(6)         |
| >PND180                                          | 2(3)          | —                | —             | —            |
| Total                                            | 16(48)        | 11(16)           | 7(17)         | 6(7)         |
| <b>Epididymis weight</b>                         |               |                  |               |              |
| <PND60                                           | 2(6)          | 2(2)             | 1(2)          | 1(1)         |
| PND60-PND180                                     | 12(28)        | 12(13)           | 7(14)         | 6(7)         |
| >PND180                                          | 2(4)          | —                | —             | —            |
| Total                                            | 13(38)        | 12(15)           | 7(16)         | 6(8)         |
| <b>Seminal vesicle weight</b>                    |               |                  |               |              |
| <PND60                                           | 2(4)          | —                | 1(1)          | —            |
| PND60-PND180                                     | 11(22)        | 9(10)            | 4(6)          | 3(4)         |
| >PND180                                          | 2(4)          | —                | —             | —            |
| Total                                            | 14(30)        | 9(10)            | 5(7)          | 3(4)         |
| <b>Sperm motility</b>                            |               |                  |               |              |
| <PND60                                           | 1(3)          | —                | —             | —            |
| PND60-PND180                                     | 3(8)          | 4(5)             | 5(11)         | 4(4)         |
| >PND180                                          | —             | —                | —             | —            |
| Total                                            | 4(11)         | 4(5)             | 5(11)         | 4(4)         |
| <b>Daily sperm production (DSP; testis)</b>      |               |                  |               |              |
| <PND60                                           | —             | —                | —             | —            |
| PND60-PND180                                     | 5(11)         | 4(6)             | 3(7)          | 2(3)         |
| >PND180                                          | 1(2)          | —                | —             | —            |
| Total                                            | 6(13)         | 4(6)             | 3(7)          | 2(3)         |
| <b>Efficiency of sperm production (testis/g)</b> |               |                  |               |              |
| <PND60                                           | —             | —                | —             | —            |
| PND60-PND180                                     | 5(11)         | 4(6)             | 3(7)          | —            |
| >PND180                                          | 1(2)          | —                | —             | —            |
| Total                                            | 6(13)         | 4(6)             | 3(7)          | —            |

**Epididymal sperm count**

|              |       |       |      |      |
|--------------|-------|-------|------|------|
| <PND60       | 1(3)  | —     | 1(1) | —    |
| PND60-PND180 | 7(15) | 7(10) | 4(8) | 2(3) |
| >PND180      | —     | —     | —    | —    |
| Total        | 8(18) | 7(10) | 5(9) | 2(3) |

**Supplementary Table 4. Egger’s regression test of each analysis.**

| Author Ref                                | Dose          |                  |               |              |
|-------------------------------------------|---------------|------------------|---------------|--------------|
|                                           | 0-60ug/kg/day | 100-600ug/kg/day | 1-50mg/kg/day | >50mg/kg/day |
| Body weight                               | 0.146         | 0.555            | 0.866         | 0.086        |
| Prostate weight                           | 0.945         | 0.651            | 0.797         | 0.190        |
| Testis weight                             | 0.177         | 0.144            | 0.922         | 0.928        |
| Epididymis weight                         | 0.847         | 0.740            | 0.061         | 0.057        |
| Seminal vesicle weight                    | 0.280         | 0.952            | 0.341         | 0.059        |
| Sperm motility                            | 0.071         | 0.442            | 0.472         | 0.279        |
| Daily sperm production (DSP; testis)      | 0.334         | 0.351            | 0.231         | 0.354        |
| Efficiency of sperm production (testis/g) | 0.812         | 0.053            | 0.526         | —            |
| Epididymal sperm count                    | 0.312         | 0.081            | 0.143         | 0.268        |
