# Supplementary material for: Early-life exposure to bisphenol A and reproductive-related outcomes in rodent models: a systematic review and meta-analysis
Source: Aging (Albany NY). 2020 Sep 30;12(18):18099–126. doi: 10.18632/aging.103620 (PMC7585097; doi:10.18632/aging.103620)
Supplement: Supplementary Table 1 [file aging-12-103620-s002..xls]

## Sheet: Table S1
Table S1. Comprehensive search strategies for PubMed, EMBASE and Toxline database
Component	Search terms
PubMed
Component 1: bisphenol A	“bisphenol A” [tiab] OR BPA [tiab] OR “2,2-bis(4-hydroxyphenyl)propane” [tiab] OR “4,4'-Isopropylidenediphenol” [tiab] OR diphenylolpropane [tiab] OR “4,4'-dihydroxy-2,2-diphenylpropane” [tiab] OR tributyltin [tiab] OR TBT [tiab] OR “tributyltin chloride” [tiab] OR "organotin compounds"[MeSH] OR organotin [tiab] OR "tri-n-butyltin chloride" [tiab] OR tri-n-butyltin [tiab] OR "tributyl tin" [tiab]…
Component 2: reproduvtive	"Genitalia, Male"[Mesh] OR Male Genitalia[Title/Abstract] OR Genital Organs, Male[Title/Abstract]) OR Genital, Male[Title/Abstract] OR Male Genital[Title/Abstract] OR Male Genitals[Title/Abstract] OR Reproductive System, Male[Title/Abstract] OR Male Reproductive System[Title/Abstract] OR Male Reproductive Systems[Title/Abstract] OR Reproductive Systems, Male[Title/Abstract] OR Accessory Sex Organ…
Component 3: rodent studies	“rodentia” [MeSH] OR rodent [tiab] OR rodentia [tiab] OR rodents [tiab] OR mice [tiab] OR mus [tiab] OR mouse [tiab] OR murine [tiab] OR woodmouse [tiab] OR rats[tiab] OR rat [tiab] OR rattus [tiab] OR norvegicus [tiab] OR sigmodon [tiab] OR microtus [tiab] OR murinae [tiab] OR muridae [tiab] OR apodemus [tiab] OR “myodes glareolus” [tiab] OR myodes [tiab] OR cottonrat [tiab] OR cottonrats [tiab]…
Component 4: sperm	"Spermatozoa"[Mesh] OR Spermatozoon[Title/Abstract] OR Sperm[Title/Abstract] OR X-Chromosome-Bearing Sperm[Title/Abstract] OR Sperm, X-Chromosome-Bearing[Title/Abstract] OR Sperms, X-Chromosome-Bearing[Title/Abstract] OR X Chromosome Bearing Sperm[Title/Abstract] OR X-Chromosome-Bearing Sperms[Title/Abstract] OR X-Bearing Sperm[Title/Abstract]) OR Sperm, X-Bearing[Title/Abstract] OR Sperms, X-Bea…
EMBASE
Component 1: exposure	“4,4` isopropylidenediphenol”/exp OR “4,4` isopropylidenediphenol”:ab,ti OR “bisphenol A”:ab,ti OR “BPA”:ab,ti OR “2,2-bis(4-hydroxyphenyl)propane”:ab,ti OR “diphenylolpropane”:ab,ti OR “4,4`-dihydroxy-2,2-diphenylpropane”:ab,ti OR "organotin compounds"/exp OR “organotin”:ab,ti OR “tributyltin chloride”:ab,ti OR “tributyltin”:ab,ti OR “TBT”:ab,ti OR "tri-n-butyltin chloride”:ab,ti OR “tri-n-butyl…
Component 2: reproduvtive	"Genitalia, Male"[Mesh] OR Male Genitalia[Title/Abstract] OR Genital Organs, Male[Title/Abstract]) OR Genital, Male[Title/Abstract] OR Male Genital[Title/Abstract] OR Male Genitals[Title/Abstract] OR Reproductive System, Male[Title/Abstract] OR Male Reproductive System[Title/Abstract] OR Male Reproductive Systems[Title/Abstract] OR Reproductive Systems, Male[Title/Abstract] OR Accessory Sex Organ…
Component 3: rodent studies	“rodent”/exp OR “rodent”:ab,ti OR “rodents”:ab,ti OR “rodentia”:ab,ti OR “murinae”:ab,ti OR “mouse”:ab,ti OR “mice”:ab,ti OR “mus”:ab,ti OR “murine”:ab,ti OR “woodmouse”:ab,ti OR “muridae”:ab,ti OR “apodemus”:ab,ti OR “rat”:ab,ti OR “rats”:ab,ti OR “rattus”:ab,ti OR “norvegicus”:ab,ti OR “guinea pig”:ab,ti OR “guinea pigs”:ab,ti OR “cavia porcellus”:ab,ti OR “cavia”:ab,ti OR “octodon”:ab,ti OR “h…
Component 4: sperm	"Spermatozoa"[Mesh] OR Spermatozoon[Title/Abstract] OR Sperm[Title/Abstract] OR X-Chromosome-Bearing Sperm[Title/Abstract] OR Sperm, X-Chromosome-Bearing[Title/Abstract] OR Sperms, X-Chromosome-Bearing[Title/Abstract] OR X Chromosome Bearing Sperm[Title/Abstract] OR X-Chromosome-Bearing Sperms[Title/Abstract] OR X-Bearing Sperm[Title/Abstract]) OR Sperm, X-Bearing[Title/Abstract] OR Sperms, X-Bea…
Toxline
All	(((((((((((((((((((((((((("Spermatozoa"[Mesh]) OR Spermatozoon[Title/Abstract]) OR Sperm[Title/Abstract]) OR X-Chromosome-Bearing Sperm[Title/Abstract]) OR Sperm, X-Chromosome-Bearing[Title/Abstract]) OR Sperms, X-Chromosome-Bearing[Title/Abstract]) OR X Chromosome Bearing Sperm[Title/Abstract]) OR X-Chromosome-Bearing Sperms[Title/Abstract]) OR X-Bearing Sperm[Title/Abstract]) OR Sperm, X-Bearin…
