# Supplementary material for: Early-life exposure to bisphenol A and reproductive-related outcomes in rodent models: a systematic review and meta-analysis
Source: Aging (Albany NY). 2020 Sep 30;12(18):18099–126. doi: 10.18632/aging.103620 (PMC7585097; doi:10.18632/aging.103620)
Supplement: Supplementary Table 2 [file aging-12-103620-s003..xls]

## Sheet: Table S2
Table S2. Risk of Bias and methodological quality of the included studies
Article											Overall reporting quality indicators		Indicators for intralitter correlation
Author Ref	Q1	Q2	Q3	Q4	Q5	Q6	Q7	Q8	Q9	Q10	Q11	Q12	Q13	Q14
	Was the allocation sequence adequately generated and applied?	Were the groups similar at baseline or were they adjusted for confounders in the analysis?	Was the allocation to the different groups adequately concealed?	Were the animals randomly housed during the experiment?	Were the caregivers and/or investigators blinded from knowledge which intervention each animal received during the experiment?	Were animals selected at random for outcome assessment?	Was the outcome assessor blinded?	Were incomplete outcome data adequately addressed?	Are reports of the study free of selective outcome reporting?	Was the study apparently free of other problems that could result in high risk of bias?	Was it stated that the experiment was randomized at any level?	Was it stated that the experiment was blinded at any level?	Was it stated that there was no conflict of interest?	Was the funding source of the study provided?
Dabeer 2020	Yes	Yes	?	?	?	?	?	?	?	?	Yes	No	Yes	Yes
Shi 2018	Yes	?	?	?	?	?	?	?	?	?	No	No	?	?
Prints 2018	?	?	?	?	?	?	Yes	?	?	?	No	Yes	No	Yes
Spörndly-Nees 2018	Yes	Yes	?	?	?	?	Yes	?	?	?	Yes	Yes	?	Yes
Dere 2018	Yes	Yes	?	?	?	?	?	?	?	?	Yes	No	Yes	Yes
Rahman 2017	Yes	?	?	?	?	?	?	?	?	?	Yes	No	No	No
Bernardo 2015	?	?	?	?	?	?	?	?	?	?	Yes	No	Yes	Yes
Rodrıguez 2015	?	?	?	?	?	?	?	?	?	?	Yes	No	?	?
Hass 2015	?	Yes	?	?	?	?	Yes	?	?	?	No	Yes	No	Yes
Delclos 2014	Yes	Yes	?	?	?	?	？	？	?	?	Yes	No	Yes	Yes
Brandt 2014	?	?	?	?	?	?	Yes	?	?	?	Yes	Yes	Yes	Yes
Gámez 2014	?	?	?	?	?	?	?	?	?	?	Yes	No	Yes	?
Vilela 2013	?	?	?	?	?	?	?	Yes	?	?	No	No	No	Yes
Kendig 2012	Yes	?	?	?	?	?	Yes	?	?	?	No	Yes	Yes	Yes
Kobayashi 2012	Yes	?	?	?	?	?	?	?	?	?	Yes	No	No	Yes
LaRocca 2011	?	?	?	?	?	?	?	?	?	?	No	No	No	Yes
Salian 2009a	?	?	?	?	?	?	?	?	?	?	Yes	No	Yes	Yes
Salian 2009b	Yes	?	?	?	?	?	?	?	?	?	Yes	No	No	Yes
Tyl 2007	Yes	Yes	?	?	?	?	?	?	?	?	Yes	No	?	Yes
Howdeshell 2007	?	?	?	?	?	?	Yes	Yes	?	?	No	Yes	?	Yes
Kato 2006	?	Yes	?	?	?	?	?	?	?	?	No	No	Yes	?
Ichihara 2003	?	?	?	?	?	?	?	?	?	?	No	No	No	Yes
Romas 2003	?	?	?	?	?	?	?	?	?	?	No	No	?	Yes
Tyl 2002	?	?	?	?	?	?	?	?	?	?	Yes	No	No	Yes
Tinwell 2002	?	Yes	?	?	?	?	?	?	?	?	No	No	Yes	Yes
Yoshino 2002	?	Yes	?	?	?	?	?	?	?	?	Yes	No	No	Yes
Nagao 2002	?	Yes	?	?	?	?	?	?	?	No	No	No	Yes	?
Emma 2001	Yes	?	?	?	?	?	?	?	?	?	Yes	No	No	Yes
Kwon 2000	Yes	Yes	?	?	?	?	?	?	?	?	No	No	No	Yes
Cagen 1999	Yes	Yes	?	?	?	?	?	?	?	?	Yes	Yes	Yes	Yes
Ashby 1999	?	?	?	?	?	?	Yes	?	?	?	Yes	Yes	Yes	Yes
Vom Saal 1998	?	?	?	?	?	?	?	?	?	?	Yes	No	?	?
