# Supplementary material for: Early-life exposure to bisphenol A and reproductive-related outcomes in rodent models: a systematic review and meta-analysis
Source: Aging (Albany NY). 2020 Sep 30;12(18):18099–126. doi: 10.18632/aging.103620 (PMC7585097; doi:10.18632/aging.103620)
Supplement: Supplementary Table 5 [file aging-12-103620-s001..xls]

## Sheet: Table S5
Table S5. Sensitivity analyses of the included studies
Author Ref	Body weight				Prostate weight				Testis weight				Epididymis weight				Seminal vesicle weight				Sperm motility				Daily sperm production (DSP; testis)				Efficiency of sperm production (testis/g)			Epididymal sperm count
	0-60ug/kg/day	100-600ug/kg/day	1-50mg/kg/day	>50mg/kg/day	0-60ug/kg/day	100-600ug/kg/day	1-50mg/kg/day	>50mg/kg/day	0-60ug/kg/day	100-600ug/kg/day	1-50mg/kg/day	>50mg/kg/day	0-60ug/kg/day	100-600ug/kg/day	1-50mg/kg/day	>50mg/kg/day	0-60ug/kg/day	100-600ug/kg/day	1-50mg/kg/day	>50mg/kg/day	0-60ug/kg/day	100-600ug/kg/day	1-50mg/kg/day	>50mg/kg/day	0-60ug/kg/day	100-600ug/kg/day	1-50mg/kg/day	>50mg/kg/day	0-60ug/kg/day	100-600ug/kg/day	1-50mg/kg/day	0-60ug/kg/day	100-600ug/kg/day	1-50mg/kg/day	>50mg/kg/day
Dabeer 2020																																		√
Shi 2018	√								√												√											√
Prints 2018	√	√	√
Spörndly-Nees 2018	√								√				√				√
Dere 2018	√	√	√	√					√	√	√	√	√	√	√	√
Rahman 2017																																√		√
Bernardo 2015	√	√			√	√
Rodrıguez 2015	√				√
Hass 2015	√	√	√		√	√	√		√	√	√		√	√	√		√	√	√
Delclos 2014									√			√	√	√	√	√	√	√	◎	√
Brandt 2014	√	√
Gámez 2014	◎								◎								◎
Vilela 2013																																√	√
Kendig 2012					√	√	√	◎	√	√	√											◎	√	√									√		◎
Kobayashi 2012		√	√			√	√			√	√			√	√							√	√
LaRocca 2011	√		√		◎				√		√						√		√
Salian 2009 (1)	√								√								√				◎
Salian 2009 (2)																						◎	◎									◎	√	√
Tyl 2007	√	√	√	√	√	√	√	√	√	√	√	√	√	√	√	√					√	√	√	√	√	√	√	√	√	√	√	√	√	√	√
Howdeshell 2007	√	√							√				√	√			√	√														√	√
Kato 2006	√	√		√					√	√		√	√	√		√	√	√		√	√	√		√
Ichihara 2003	√		√								◎		◎		◎
Tyl 2002	√	√	√	◎	√	√	√	√	√	√		◎	√	√	√	√	√	√	√	◎	√	√	√	√	√	√	√	√	√	√	√	√	√	√	√
Tinwell 2002	√	√	√						√	√	√	√	◎	√			√	√	√						√	√	√		√	√	√
Yoshino 2002			√								◎				◎								√
Nagao 2002	◎	√							√	√			√	√			√	√														√	◎
Ema 2001	√	√			√	√				√			√	√			√	√
Kwon 2000			√	√								√			√	√			√	√
Cagen 1999	√	√			√	√	◎		√	√			√	√			√	√							√	√			√	√		√	√
Ashby 1999	√				√				◎				√				√								◎				◎
Vom Saal 1998	√								√				√				√								√				√
Note: √, be included in the analysis; ◎, be excluded due to sensitivity analysis
